# Supplementary material for: In situcopper nanoparticle immobilization on the indigo carmine-functionalized chitosan: a versatile biocatalyst towards CO2fixation and click reactions in water
Source: Royal Society of Chemistry journal article supplement (doi:10.1039/d2re00195k), 2022-09-29

# ***In-situ* copper nanoparticles immobilization on the indigo carmine-functionalized chitosan: A versatile biocatalyst towards CO<sub>2</sub> fixation and click reactions in water**

Vida Khodkari<sup>a</sup>, Mohammad Taghi Nazeri<sup>a, †</sup>, Siamak Javanbakht<sup>a, †</sup>, Ahmad Shaabani<sup>\*a,b</sup>

<sup>[a]</sup> *Department of Organic Chemistry, Shahid Beheshti University, Daneshjou Boulevard Street, Tehran, 1983969411, Iran*

<sup>[b]</sup> *Peoples' Friendship University of Russia (RUDN University), 6, Miklukho-Maklaya Street, Moscow, 117198, Russian Federation*

## Contents

|                                                                             |    |
|-----------------------------------------------------------------------------|----|
| 1. The optimization conditions for the click reaction .....                 | 1  |
| 1-1. Catalytic activity of Cu <sub>2</sub> O/IC-CS bio-nanocomposite .....  | 1  |
| 2. The optimization conditions for the CO <sub>2</sub> fixation.....        | 3  |
| 2-1. Catalytic activity of the synthesized CuO/IC-CS .....                  | 3  |
| 3. <sup>1</sup> H NMR data of isolated pure product triazoles .....         | 4  |
| 4. <sup>1</sup> H NMR data of isolated pure product cyclic carbonates ..... | 5  |
| 5. <sup>1</sup> H NMR spectrum of products 3a-f.....                        | 6  |
| 6. <sup>1</sup> H NMR spectrum of products 6a-e .....                       | 10 |

## 1. The optimization conditions for the click reaction

### 1-1. Catalytic activity of Cu<sub>2</sub>O/IC-CS bio-nanocomposite

In the beginning, the catalytic activity of the newly synthesized Cu<sub>2</sub>O/IC-CS bio-nanocomposite was evaluated in the click reaction. A model reaction of benzyl bromide **1a**,

---

\*Corresponding author. Tel.: +982129902800; e-mail: [a-shaabani@sbu.ac.ir](mailto:a-shaabani@sbu.ac.ir)

<sup>†</sup>These authors contributed equally to this work.

phenylacetylene **2a** and sodium azide was examined under different conditions (Table S1). Initially, water was chosen as a reaction medium and the model reaction was explored in various amounts of catalyst. In the absence of catalyst at 60 °C after 1 h no desired product was obtained (Table, Entry 1). The reaction was repeated in the presence of different amounts of catalyst at different times and temperatures, where the desired product was obtained by using 5 mg of catalyst at 60 °C for 40 minutes with a yield of 97% (Table S1, Entries 2-8). After realizing the time, temperature, and optimal amount of the catalyst, the reaction was investigated in solvents such as MeOH, CH<sub>2</sub>Cl<sub>2</sub>, MeCN, and DMF (Table S1, Entries 9-12). The results show that water is the most optimal solvent for this reaction (Table S1, Entry 6). To determine the effect of temperature, the reaction was repeated under optimal conditions at room temperature, the result shows that no product was observed (Table S1, Entry 13). For the efficiency of the synthesized catalyst, the reaction was designed under optimal conditions, using CuO/CS and Cu<sub>2</sub>O/IC instead of the synthesized catalyst, and products with acceptable efficiencies were not obtained (Table S1, Entries 14-15).

**Table S1.** Optimization of the click reaction conditions for the synthesis of 1,2,3-triazole<sup>a</sup>

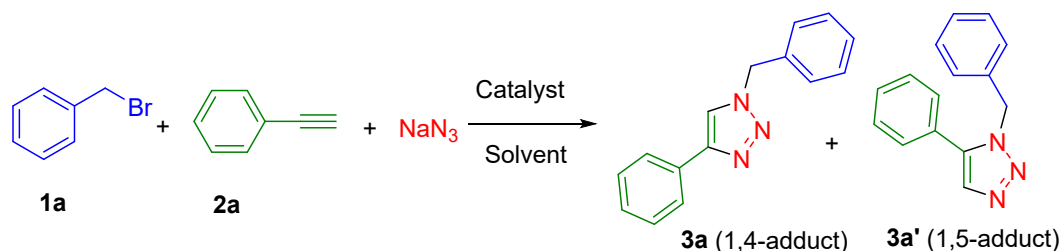

| Entry    | Catalyst                     | Amount of catalyst (mg) | Time (min) | Solvent                         | T (°C)    | Yield (%)                   |
|----------|------------------------------|-------------------------|------------|---------------------------------|-----------|-----------------------------|
| 1        | -                            | -                       | 60         | H <sub>2</sub> O                | 60        | 13 (both regioisomers)      |
| 2        | Cu <sub>2</sub> O/IC-CS      | 5                       | 20         | H <sub>2</sub> O                | 60        | 22 (only 1,4-adduct)        |
| 3        | Cu <sub>2</sub> O/IC-CS      | 5                       | 30         | H <sub>2</sub> O                | 60        | 53 (only 1,4-adduct)        |
| 4        | Cu <sub>2</sub> O/IC-CS      | 10                      | 40         | H <sub>2</sub> O                | 40        | 49 (only 1,4-adduct)        |
| 5        | Cu <sub>2</sub> O/IC-CS      | 20                      | 40         | H <sub>2</sub> O                | 50        | 26 (only 1,4-adduct)        |
| <b>6</b> | <b>Cu<sub>2</sub>O/IC-CS</b> | <b>5</b>                | <b>40</b>  | <b>H<sub>2</sub>O</b>           | <b>60</b> | <b>97 (only 1,4-adduct)</b> |
| 7        | Cu <sub>2</sub> O/IC-CS      | 5                       | 40         | H <sub>2</sub> O                | 40        | 49 (only 1,4-adduct)        |
| 8        | Cu <sub>2</sub> O/IC-CS      | 5                       | 40         | H <sub>2</sub> O                | 50        | 35 (only 1,4-adduct)        |
| 9        | Cu <sub>2</sub> O/IC-CS      | 5                       | 40         | MeOH                            | 60        | 45 (only 1,4-adduct)        |
| 10       | Cu <sub>2</sub> O/IC-CS      | 5                       | 40         | CH <sub>2</sub> Cl <sub>2</sub> | 60        | Trace                       |
| 11       | Cu <sub>2</sub> O/IC-CS      | 5                       | 40         | MeCN                            | 60        | Trace                       |
| 12       | Cu <sub>2</sub> O/IC-CS      | 5                       | 40         | DMF                             | 60        | 66 (only 1,4-adduct)        |

|    |                         |   |    |                  |    |                      |
|----|-------------------------|---|----|------------------|----|----------------------|
| 13 | Cu <sub>2</sub> O/IC-CS | 5 | 40 | H <sub>2</sub> O | -  | 0                    |
| 14 | Cu <sub>2</sub> O/CS    | 5 | 40 | H <sub>2</sub> O | 60 | 43 (only 1,4-adduct) |
| 15 | Cu <sub>2</sub> O/IC    | 5 | 40 | H <sub>2</sub> O | 60 | 62 (only 1,4-adduct) |

<sup>a</sup>Reaction conditions: benzyl bromide (1.00 mmol), sodium azide (1.00 mmol), phenylacetylene (1.00 mmol), and catalyst in a solvent.

## 2. The optimization conditions for the CO<sub>2</sub> fixation

### 2-1. Catalytic activity of the synthesized CuO/IC-CS

The CO<sub>2</sub> fixation reaction with styrene epoxide as a model reaction was studied in the presence of CuO/IC-CS biocatalyst and TBAB under the net condition at 80 °C and 1 bar for 4 h, which product was obtained with a yield of 48% (Table S2, Entry 1). In the first step to improving the reaction yield, the effect of CO<sub>2</sub> pressure was investigated, and by increasing the CO<sub>2</sub> to 3 bar the reaction yield was improved to 94% (Table S2, Entries 2-5). In the second step, this reaction was investigated in solvents such as DMF, EtOH, H<sub>2</sub>O, CH<sub>2</sub>Cl<sub>2</sub>, and CH<sub>3</sub>CN at different temperatures, pressure 1 bar, and catalysts amount of 30 mg and showed that the desired product was obtained in water with higher efficiency (Table S2, Entries 6-10). After identifying the optimal solvent, in the next steps, the reaction was investigated in different amounts of catalyst and co-catalyst. The best results were obtained with 30 mg of catalyst and 12 mg of cocatalyst (Table S2, Entries 11-14). Finally, to find out the effect of temperature, the reaction was investigated at 25 °C and no products were obtained (Table S2, Entry 16). Also, at 100 °C, no increase in product yield was observed (Table S2, Entry 15). This shows that in addition to the temperature catalyst, it is also a factor influencing the reaction. For the efficiency of the synthesized catalyst, the reaction under optimal conditions was designed using CuO/CS and CuO/IC in water and solvent-free conditions instead of the synthesized catalyst, and products with acceptable efficiencies were not obtained (Table S2, Entries 17-20). All these documents discussed in Table S2 indicate the activeness and efficiency of the catalyst.

**Table 3.** Screening the reaction conditions for the consecutive CO<sub>2</sub> cycloaddition with styrene oxide<sup>a</sup>.

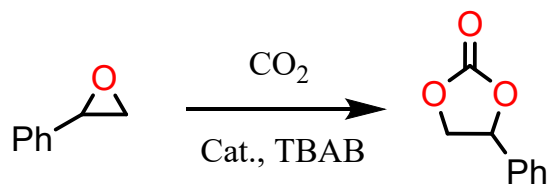

| Entry     | Catalyst         | Amount of catalyst (mg) | TBAB (mg) | Time (h) | T (°C)    | Solvent                         | P (bar)                           | Yield (%) |
|-----------|------------------|-------------------------|-----------|----------|-----------|---------------------------------|-----------------------------------|-----------|
| 1         | CuO/IC-CS        | 30                      | 12        | 4        | 80        | -                               | 1 (CO <sub>2</sub> balloon)       | 48        |
| 2         | CuO/IC-CS        | 30                      | 12        | 4        | 80        | -                               | 2                                 | 74        |
| 3         | CuO/IC-CS        | 30                      | 12        | 2        | 80        | -                               | 2                                 | 74        |
| 4         | CuO/IC-CS        | 30                      | 12        | 2        | 80        | -                               | 3                                 | 92        |
| 5         | CuO/IC-CS        | 30                      | 12        | 2        | 90        | -                               | 3                                 | 94        |
| 6         | CuO/IC-CS        | 30                      | 12        | 2        | 80        | CH <sub>3</sub> CN              | 1 (CO <sub>2</sub> balloon)       | 45        |
| 7         | CuO/IC-CS        | 30                      | 12        | 2        | 40        | CH <sub>2</sub> Cl <sub>2</sub> | 1 (CO <sub>2</sub> balloon)       | trace     |
| 8         | CuO/IC-CS        | 30                      | 12        | 2        | 80        | DMF                             | 1 (CO <sub>2</sub> balloon)       | 30        |
| 9         | CuO/IC-CS        | 30                      | 12        | 2        | 78        | EtOH                            | 1 (CO <sub>2</sub> balloon)       | 37        |
| <b>10</b> | <b>CuO/IC-CS</b> | <b>30</b>               | <b>12</b> | <b>2</b> | <b>80</b> | <b>H<sub>2</sub>O</b>           | <b>1 (CO<sub>2</sub> balloon)</b> | <b>96</b> |
| 11        | CuO/IC-CS        | 30                      | 8         | 2        | 80        | H <sub>2</sub> O                | 1 (CO <sub>2</sub> balloon)       | 71        |
| 12        | CuO/IC-CS        | 30                      | 16        | 2        | 80        | H <sub>2</sub> O                | 1 (CO <sub>2</sub> balloon)       | 96        |
| 13        | CuO/IC-CS        | 20                      | 12        | 2        | 80        | H <sub>2</sub> O                | 1 (CO <sub>2</sub> balloon)       | 88        |
| 14        | CuO/IC-CS        | 10                      | 12        | 2        | 80        | H <sub>2</sub> O                | 1 (CO <sub>2</sub> balloon)       | 76        |
| 15        | CuO/IC-CS        | 30                      | 12        | 2        | 100       | H <sub>2</sub> O                | 1 (CO <sub>2</sub> balloon)       | 96        |
| 16        | CuO/IC-CS        | 30                      | 12        | 2        | 25        | H <sub>2</sub> O                | 1 (CO <sub>2</sub> balloon)       | 0         |
| 17        | CuO/CS           | 30                      | 12        | 4        | 80        | -                               | 1 (CO <sub>2</sub> balloon)       | 27        |
| 18        | CuO/CS           | 30                      | 12        | 4        | 80        | H <sub>2</sub> O                | 1 (CO <sub>2</sub> balloon)       | 42        |
| 19        | CuO/IC           | 30                      | 12        | 4        | 80        | -                               | 1 (CO <sub>2</sub> balloon)       | 36        |
| 20        | CuO/IC           | 30                      | 12        | 4        | 80        | H <sub>2</sub> O                | 1 (CO <sub>2</sub> balloon)       | 33        |

<sup>a</sup>Conditions of reaction: Epoxide (3 mmol), CO<sub>2</sub>, TBAB, catalyst.

<sup>b</sup>Isolated yield.

### 3. <sup>1</sup>H NMR data of isolated pure product triazoles

#### 1-Benzyl-4-phenyl-1*H*-1,2,3-triazole (3a)

White solid: mp 127-128°C. <sup>1</sup>H-NMR (300.13 MHz, CDCl<sub>3</sub>) δ: 5.61 (2H, s, CH<sub>2</sub><sub>benzylic</sub>), 7.32-7.85 (11H, m, H<sub>arom</sub>).

#### 1-(4-Bromobenzyl)-4-phenyl-1*H*-1,2,3-triazole (3b)

White solid: mp 148-150°C. <sup>1</sup>H-NMR (300.13 MHz, CDCl<sub>3</sub>) δ: 5.55 (2H, s, CH<sub>2</sub><sub>benzylic</sub>), 7.18-7.86 (10H, m, H<sub>arom</sub>).

#### 2-(1-Benzyl-1*H*-1,2,3-triazol-4-yl)propan-2-ol (3c)

White solid: mp 79-80°C. <sup>1</sup>H-NMR (300.13 MHz, CDCl<sub>3</sub>) δ: 1.66 (6H, s, 2CH<sub>3</sub>), 2.90 (1H, br s, OH), 5.60 (2H, s, CH<sub>2</sub><sub>benzylic</sub>), 7.26-7.42 (6H, m, H<sub>arom</sub>).

#### 1-Benzyl-4-*p*-tolyl-1*H*-[1,2,3]triazole (3d)

White solid:  $^1\text{H-NMR}$  (300.13 MHz,  $\text{CDCl}_3$ )  $\delta$ : 2.39 (3H, s,  $\text{CH}_3$ ), 5.60 (2H, s,  $\text{CH}_{2\text{benzylic}}$ ), 7.22-7.73 (10H, m,  $\text{H}_{\text{arom}}$ ).

**(1-Benzyl-1*H*-[1,2,3]triazol-4-yl)-dimethyl-amine (3e)**

White solid:  $^1\text{H-NMR}$  (300.13 MHz,  $\text{CDCl}_3$ )  $\delta$ : 2.60-3.22 (6H, s,  $2\text{CH}_3$ ), 5.10 (2H, s,  $\text{CH}_2$ ), 5.59 (2H, s,  $\text{CH}_{2\text{benzylic}}$ ), 7.06-7.74 (10H, m,  $\text{H}_{\text{arom}}$ ).

**1-(4-Bromo-benzyl)-4-*p*-tolyl-1*H*-[1,2,3]triazole (3f)**

White solid:  $^1\text{H-NMR}$  (300.13 MHz,  $\text{CDCl}_3$ )  $\delta$ : 2.39-2.40 (3H, s,  $\text{CH}_3$ ), 5.55-5.56 (2H, s,  $\text{CH}_{2\text{benzylic}}$ ), 7.20-7.73 (9H, m,  $\text{H}_{\text{arom}}$ ).

**4.  $^1\text{H}$  NMR data of isolated pure product cyclic carbonates**

**4-Phenyl-1,3-dioxolan-2-one (5a)**

White solid:  $^1\text{H NMR}$  (300 MHz,  $\text{CDCl}_3$ )  $\delta$ : 4.35-4.39 (t,  $J = 6$  Hz, 1H), 4.79-4.89 (t,  $J = 9$  Hz, 1H), 5.67-5.72 (t,  $J = 6$  Hz, 1H), 7.37-7.48 (m, 5HAr).

**4-(Phenoxymethyl)-1,3-dioxolan-2-one (5b)**

White solid:  $^1\text{H NMR}$  (300 MHz,  $\text{CDCl}_3$ )  $\delta$ : 4.15-4.29 (m, 2H), 4.54-4.67 (m, 2H), 5.02-5.09 (m, 1H), 6.92-7.06 (m, 3HAr), 7.31-7.61 (m, 5HAr).

**Tetrahydro-4*H*-cyclopenta[*d*][1,3]dioxol-2-one (5c)**

Colorless oil:  $^1\text{H NMR}$  (300 MHz,  $\text{CDCl}_3$ )  $\delta$ : 1.42-1.50 (m, 2H), 1.76-1.85 (m, 2H), 2.13-2.19 (m, 2H), 5.12-5.15 (m, 1H).

**4-Butyl-1,3-dioxolan-2-one (5d)**

Orange oil:  $^1\text{H NMR}$  (300 MHz,  $\text{CDCl}_3$ )  $\delta$ : 0.89-0.94 (t,  $J = 9$  Hz, 3H), 1.16-1.43 (m, 4H), 1.54-1.97 (m, 2H), 3.98-4.03 (t,  $J = 6$  Hz, 1H), 4.48-4.54 (t,  $J = 6$  Hz, 1H), 4.63-4.72 (t,  $J = 6$  Hz, 1H).

**Octahydrocycloocta[*d*][1,3]dioxol-2-one (5e)**

Colorless oil:  $^1\text{H NMR}$  (300 MHz,  $\text{CDCl}_3$ )  $\delta$ : 1.06-1.14 (m, 4H), 1.40-1.46 (m, 4H), 1.96-2.24 (m, 4H), 3.16-3.27 (m, 2H).

**5.  $^1\text{H}$  NMR spectra of products 3a-f**



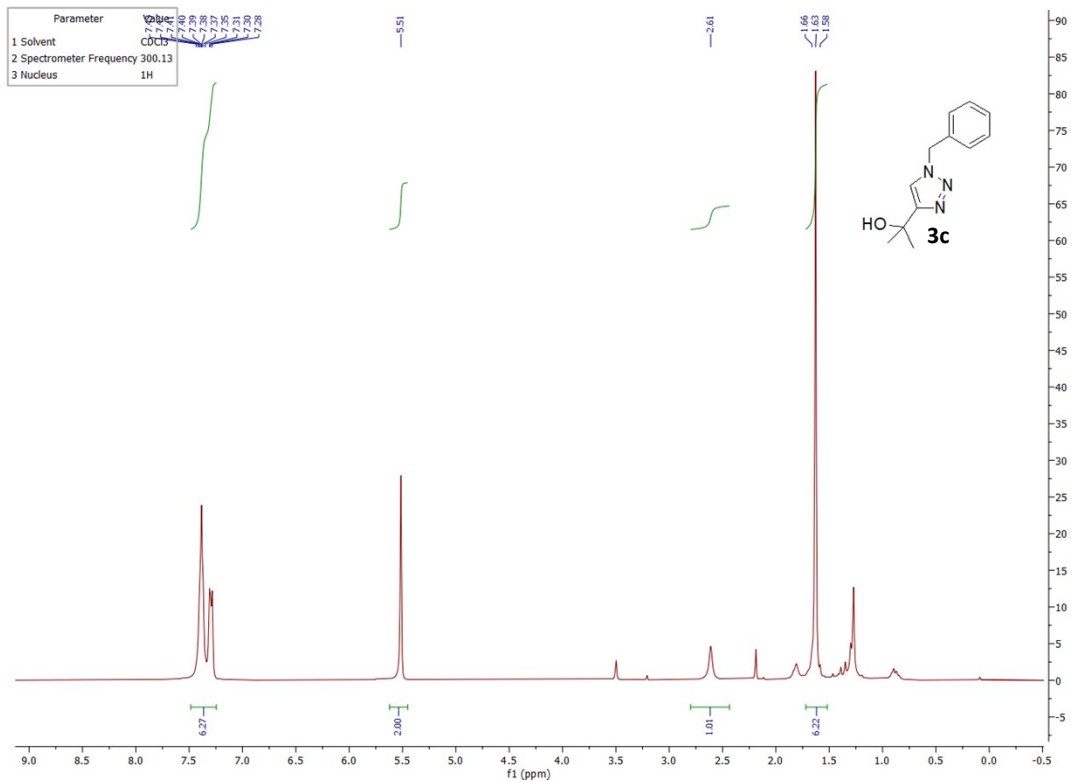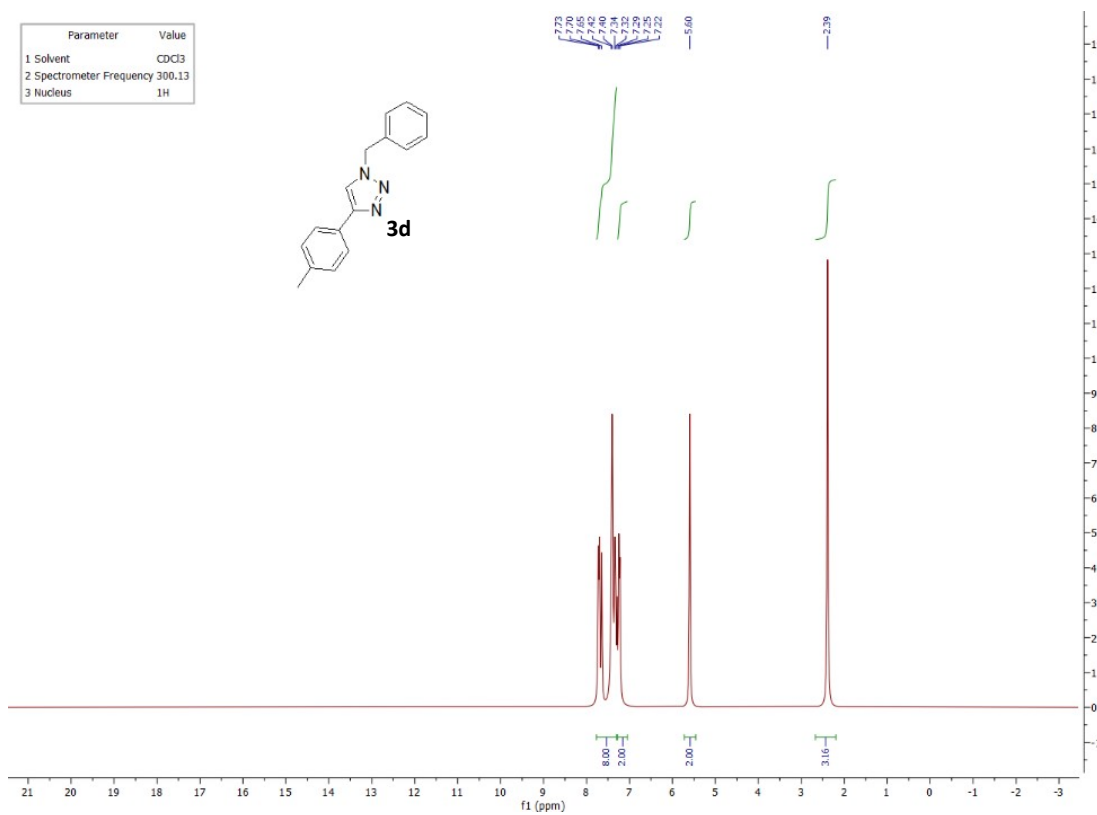

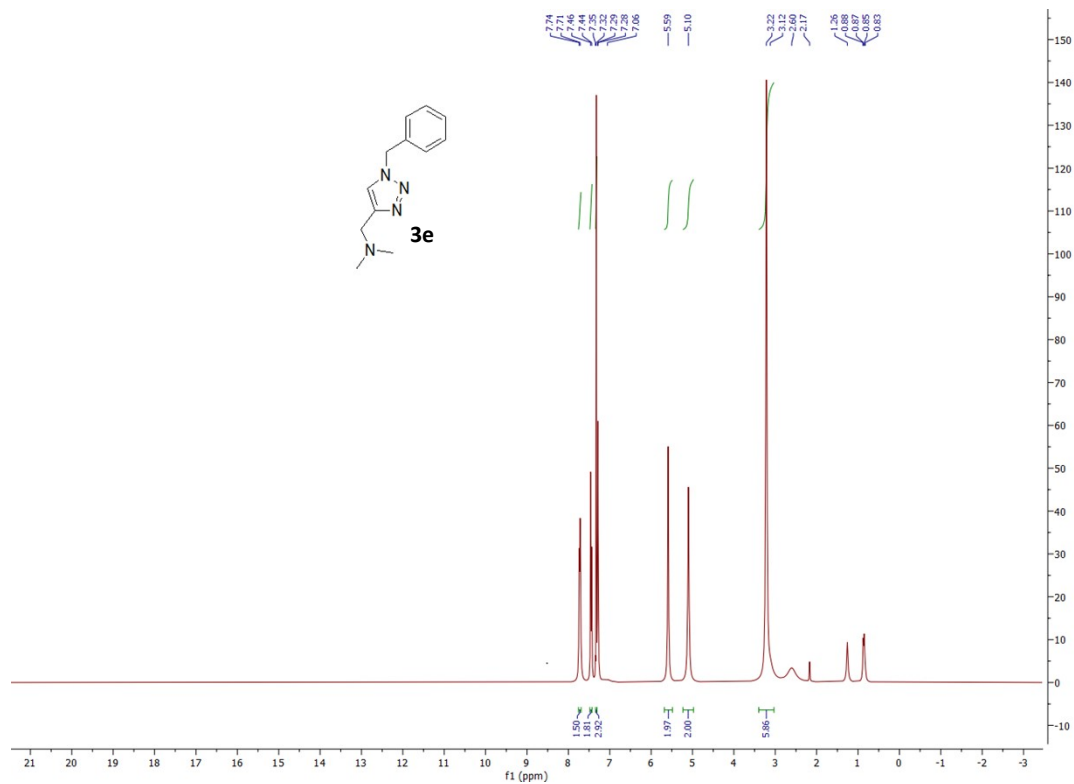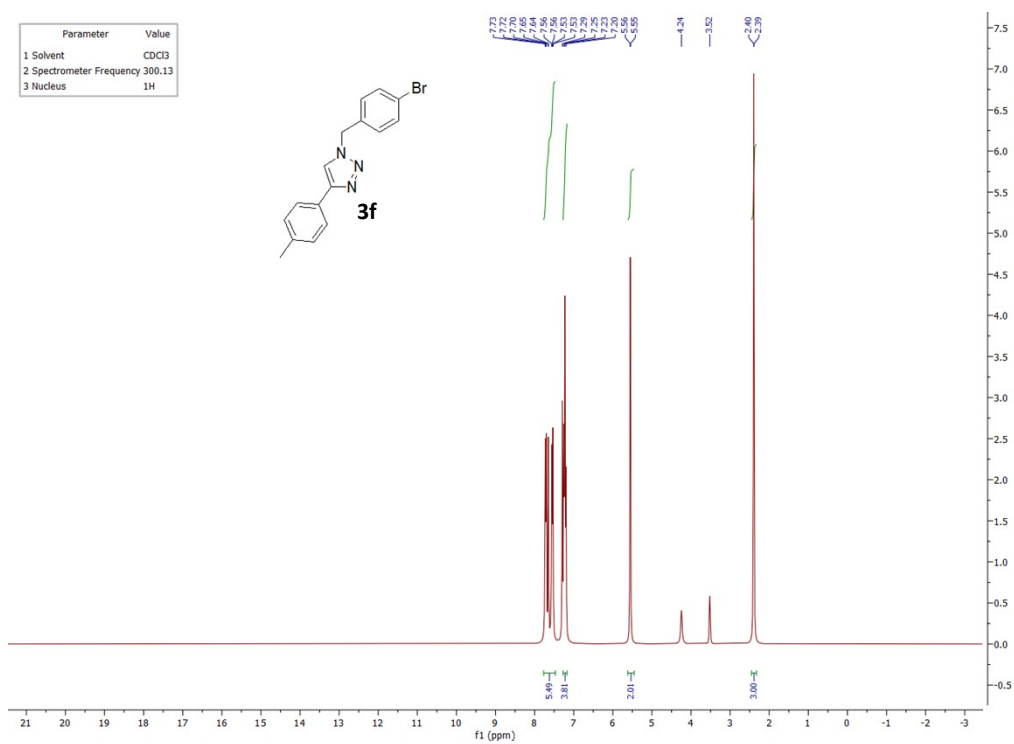



## 6. <sup>1</sup>H NMR spectrum of products 6a-e

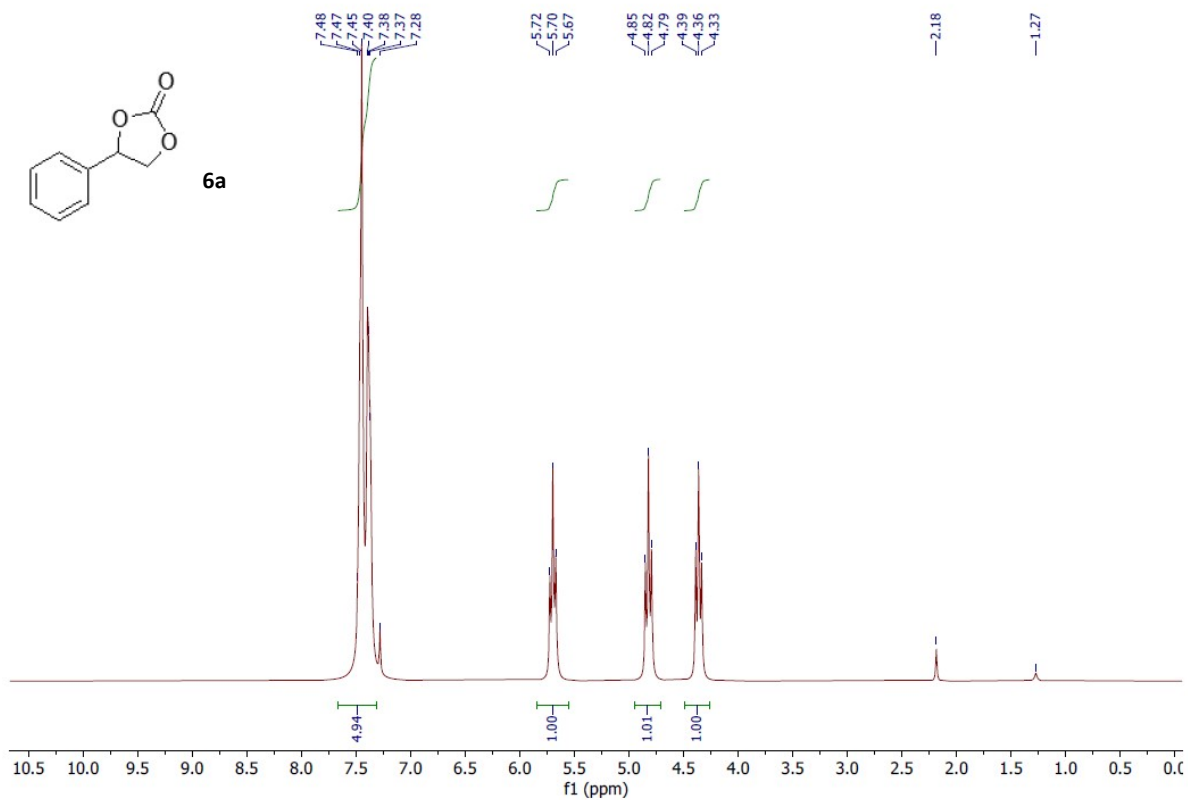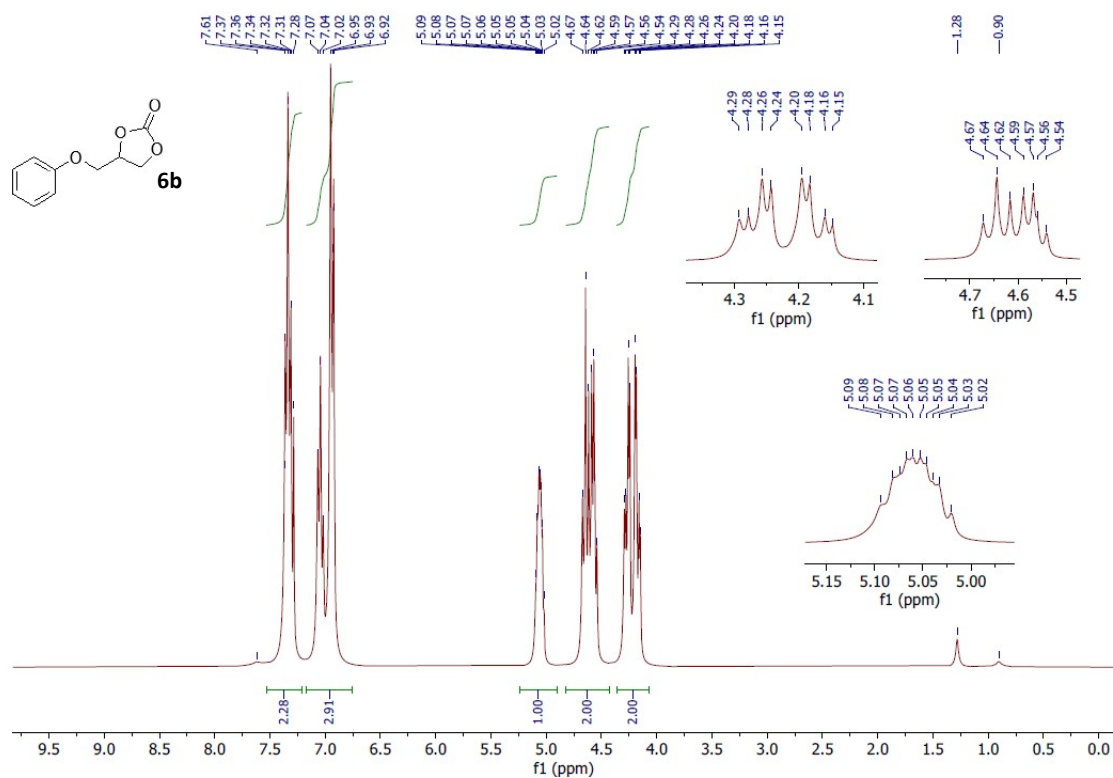

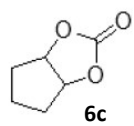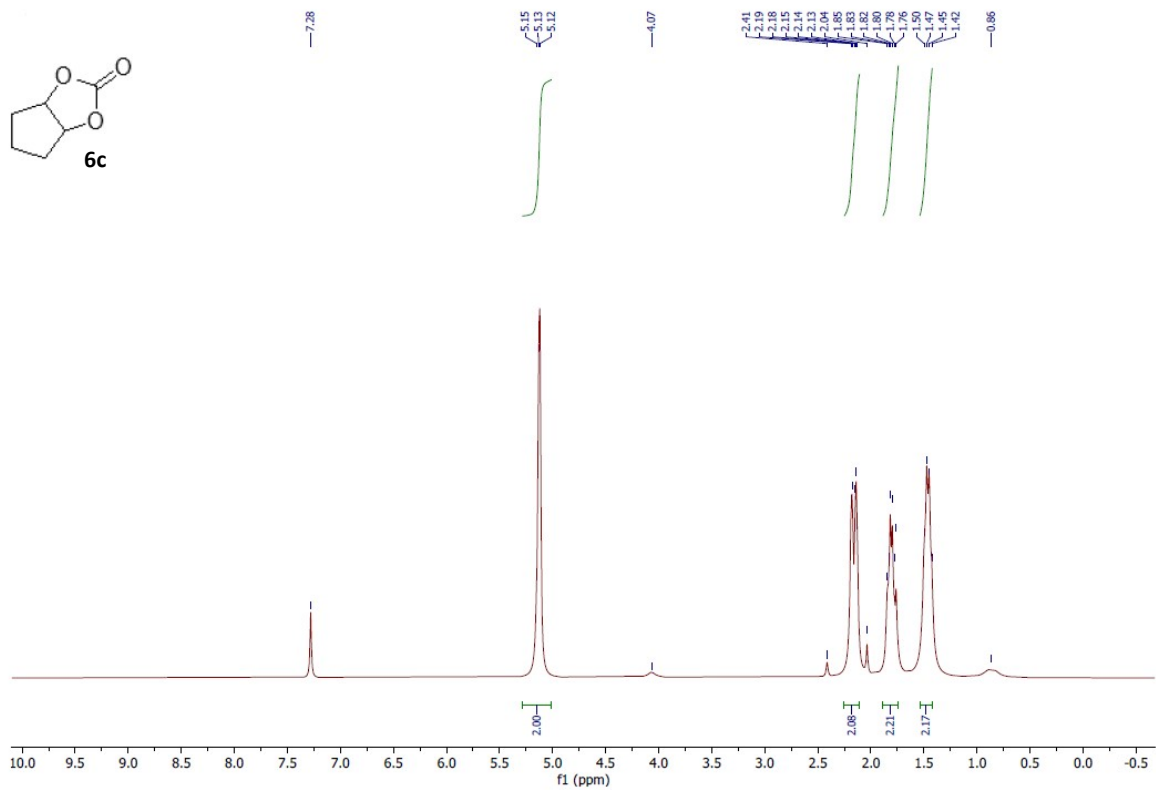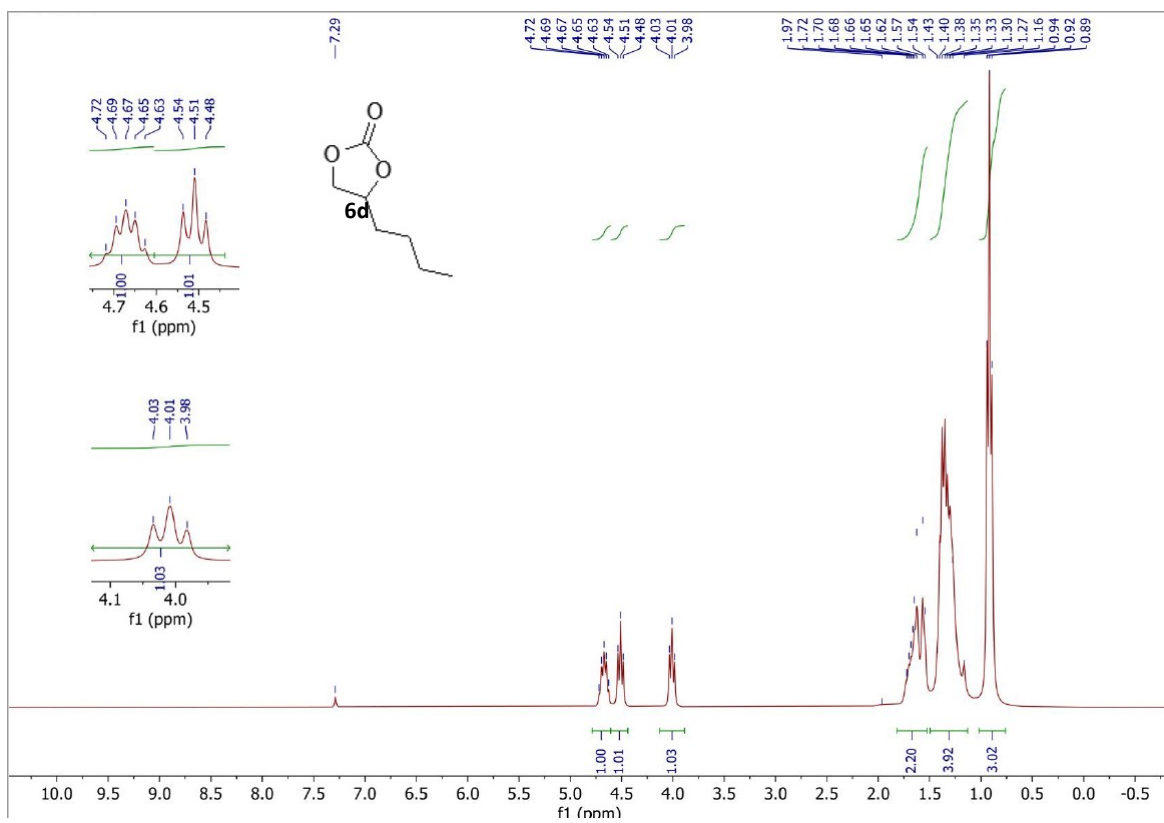

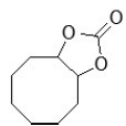

6e

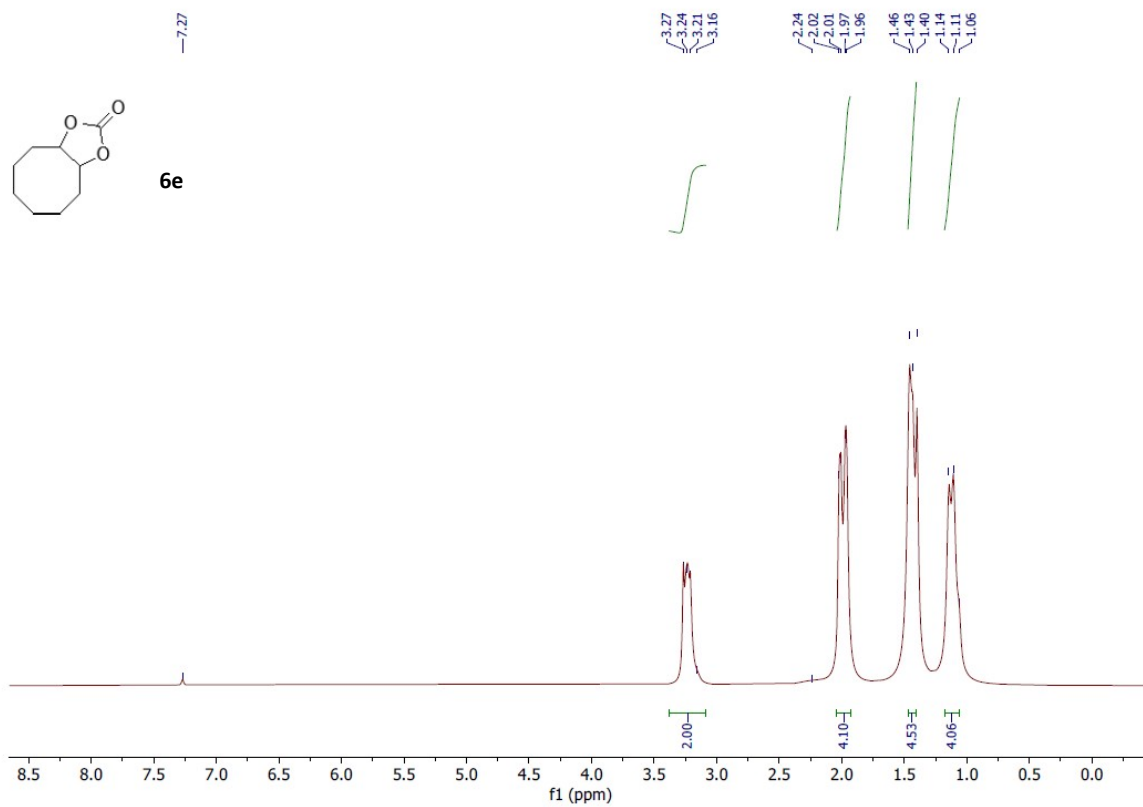

Supplement: d2re00195k1.pdf [file d2re00195k1.pdf]
